# Supplementary material
Source: PubMed Central journal article supplement (PMC3799978)

## Supplementary 2

**A**

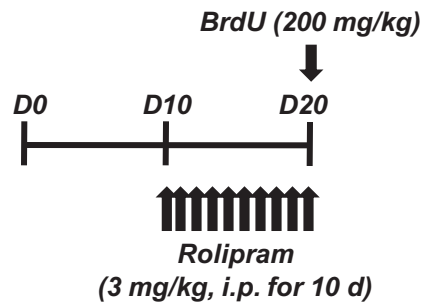

**B**

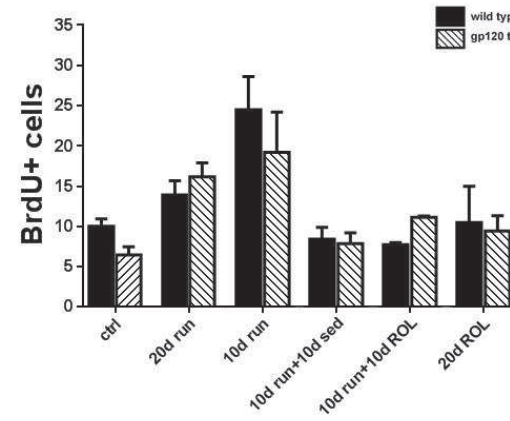

**C**

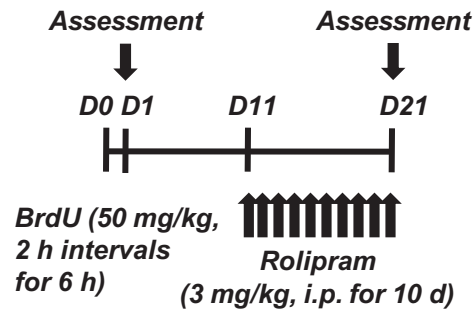

**D**

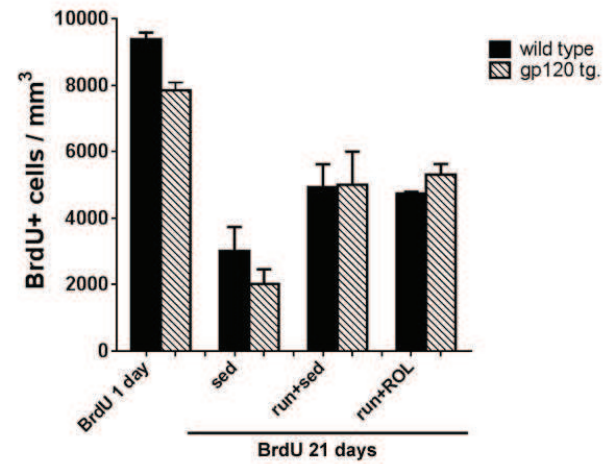

Supplement: NIHMS519669-supplement-13365_2013_194_MOESM2_ESM.pdf [file NIHMS519669-supplement-13365_2013_194_MOESM2_ESM.pdf]

# Supplementary 3

**A**

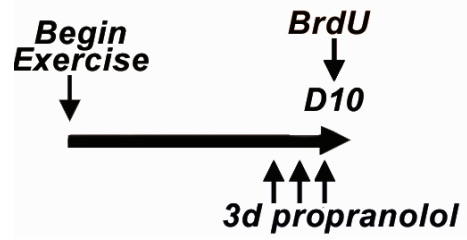

**B**

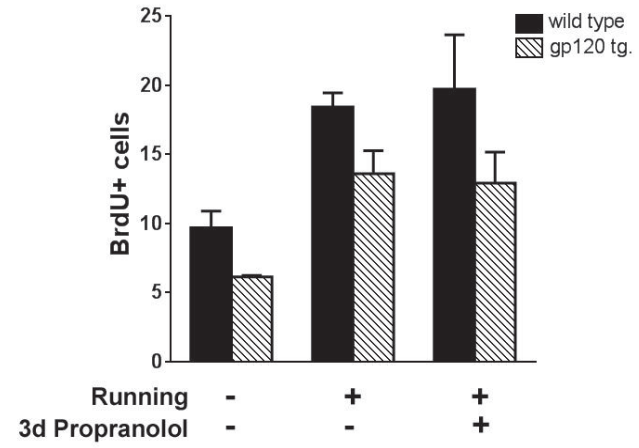

Supplement: NIHMS519669-supplement-13365_2013_194_MOESM3_ESM.pdf [file NIHMS519669-supplement-13365_2013_194_MOESM3_ESM.pdf]
